# Supplementary material for: Synthesis and electrochemical properties of slipped-cofacial porphyrin dimers of ferrocene-functionalized Zn-imidazolyl-porphyrins as potential terminal electron donors in photosynthetic models
Source: Royal Society of Chemistry journal article supplement (doi:10.1039/b506992k), 2005-11-10
Supplement: b506992k.pdf [file b506992k.pdf]

## Supplementary Data

### Synthesis and Electrochemical Properties of Slipped-Cofacial Porphyrin Dimer of Ferrocene Functionalized Zn-Imidazolyl-Porphyrins as a Terminal Electron Donor in Photosynthetic Model

Dipak Kalita, Mitsuhiro Morisue, Yoshiaki Kobuke\*

Graduate School of Materials Science, Nara Institute of Science and Technology, 8916-5

Takayama, Ikoma 630-0101, Japan

#### Improved synthetic route of 1-formyl-2,2',3,3',4,4',5,5'-octamethyl ferrocene 11:

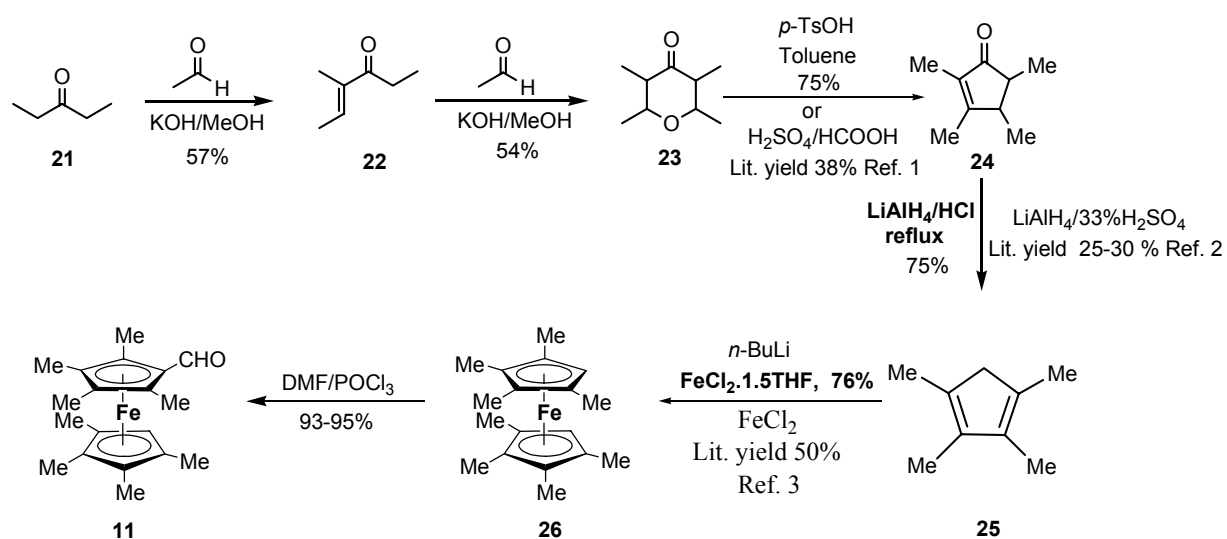

#### Reference:

- Whitesides, G.M. *Inorg. Chem.* **1976**, *15*, 466-469.
- Fendric, C.M.; Schertz, L.D.; Day, V.W.; Marks, T.J. *Organometallics* **1988**, *7*, 1828-1838.
- (a) Koeler, F.H.; Doll, K.H. *Z. Naturforsch.* **1982**, *37b*, 144-150. (b) Schmitt, V.G.; Ozman, S. *Chem. Ztg.* **1976**, *100*, 143.

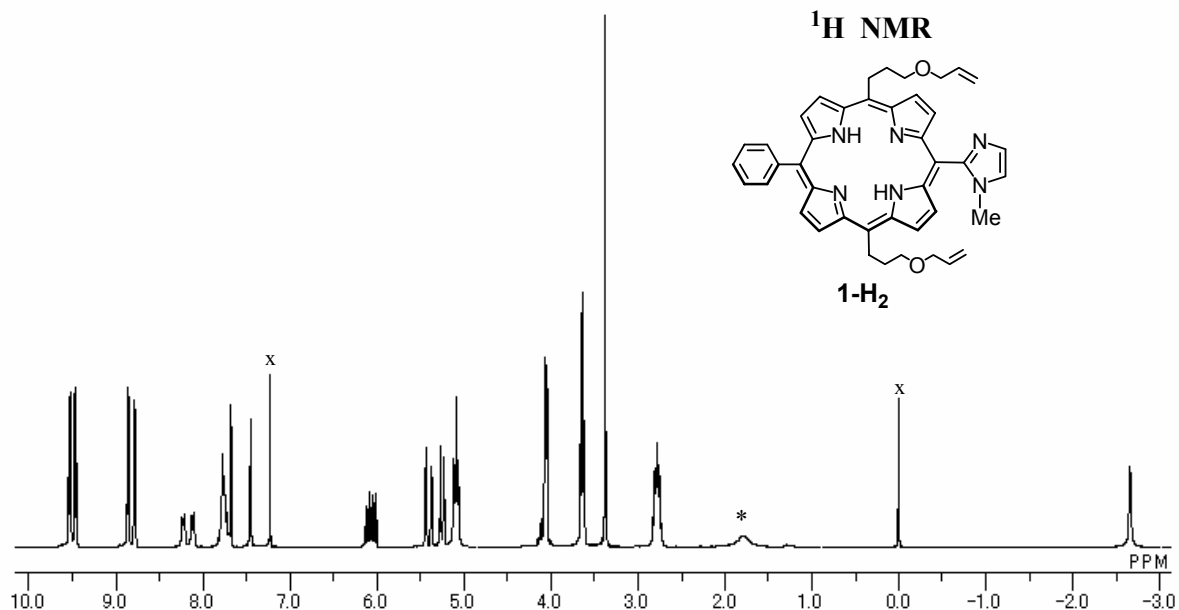

Cross (x) indicates solvent CDCl<sub>3</sub> or TMS, asterisk (\*) indicates impurity.

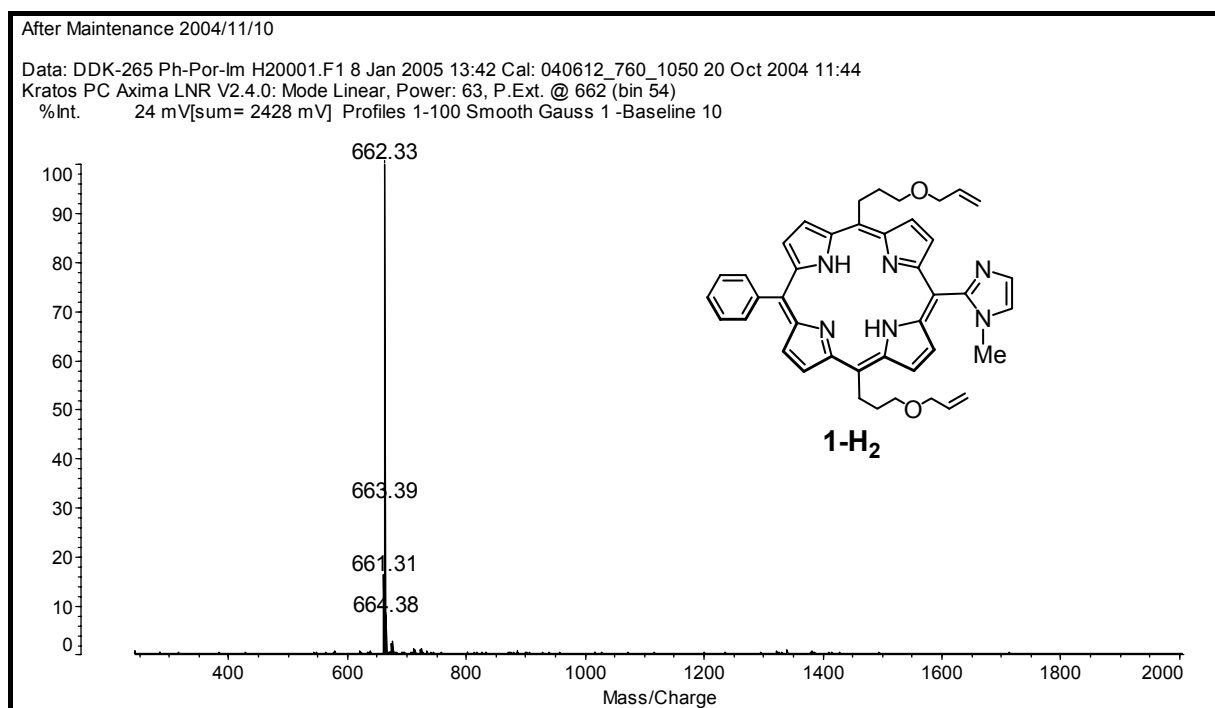

# Supplementary Material (ESI) for New Journal of Chemistry  
# This journal is © The Royal Society of Chemistry and  
# The Centre National de la Recherche Scientifique, 2005

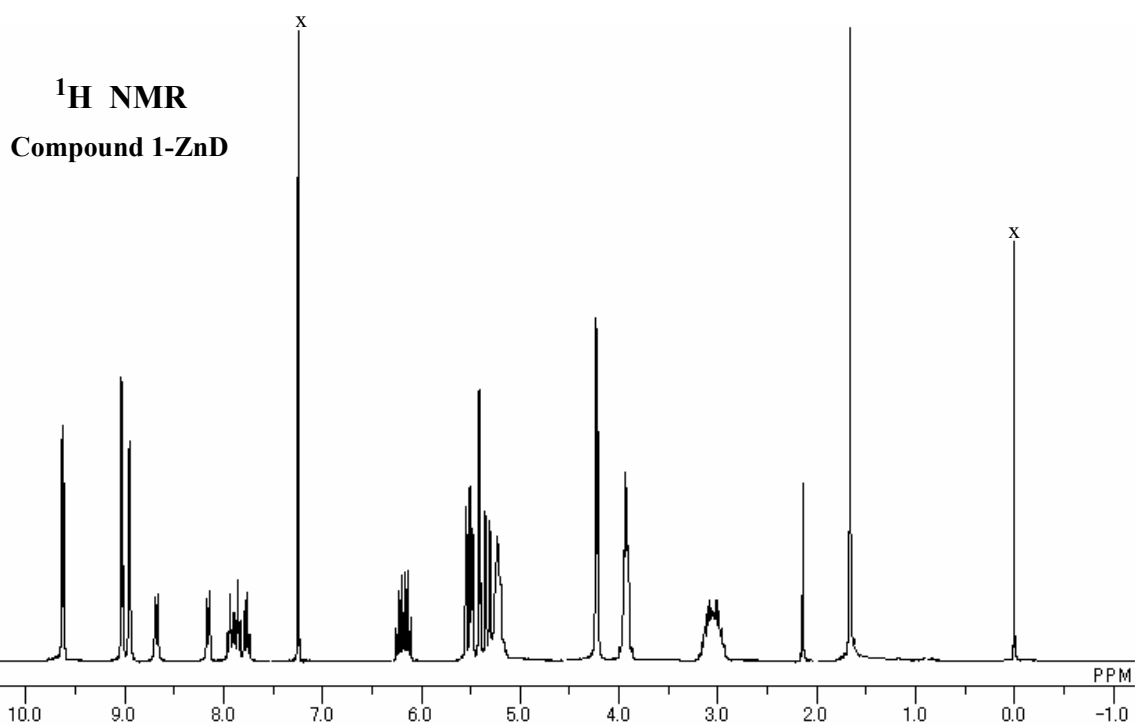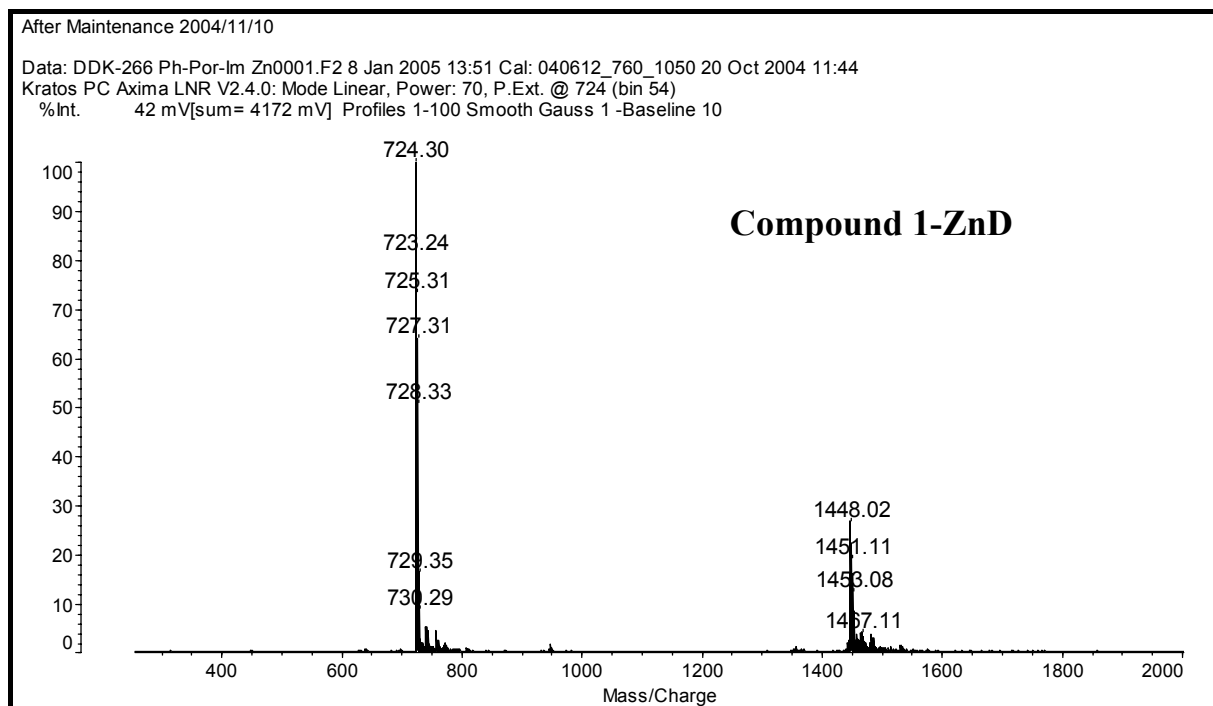

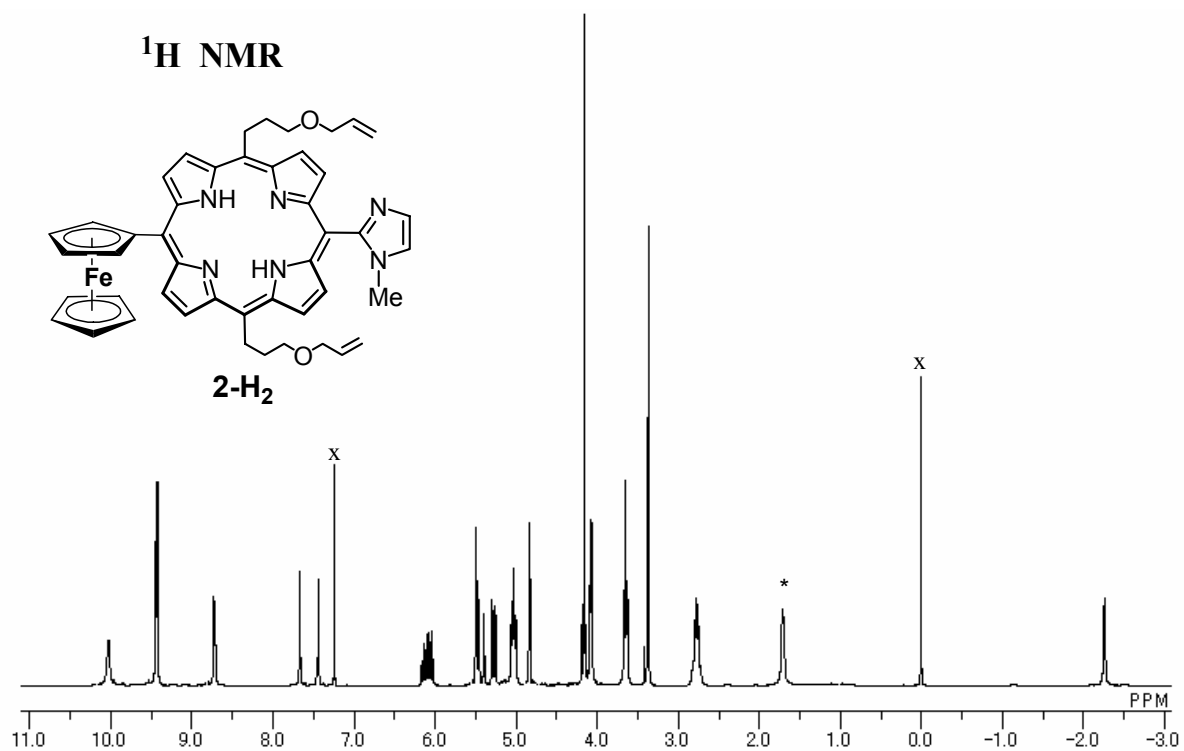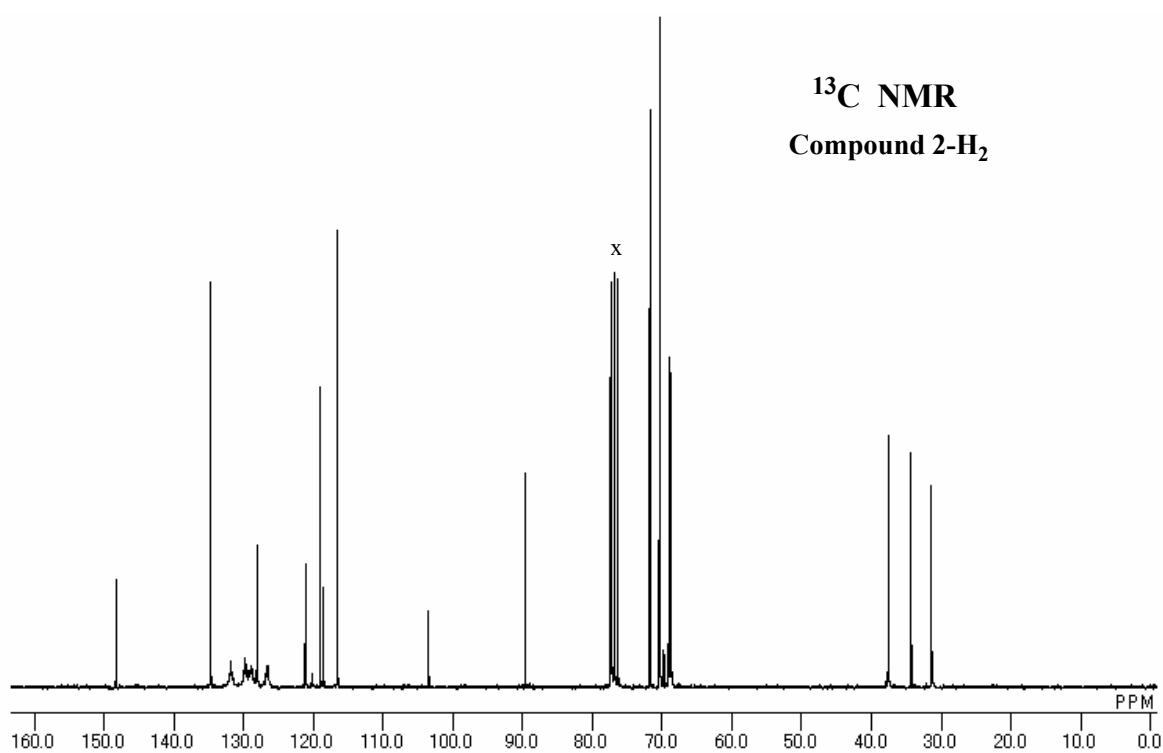

After Maintenance 2004/11/10

InsulinB 500fmol CHCA

Data: DDK-220 Fc-Por-Im H20001.F4 8 Jan 2005 14:03 Cal: 040612\_760\_1050 20 Oct 2004 11:44

Kratos PC Axima LNR V2.4.0: Mode Linear, Power: 66, P.Ext. @ 769 (bin 54)

%Int. 7.8 mV[sum= 779 mV] Profiles 1-100 Smooth Gauss 1 -Baseline 10

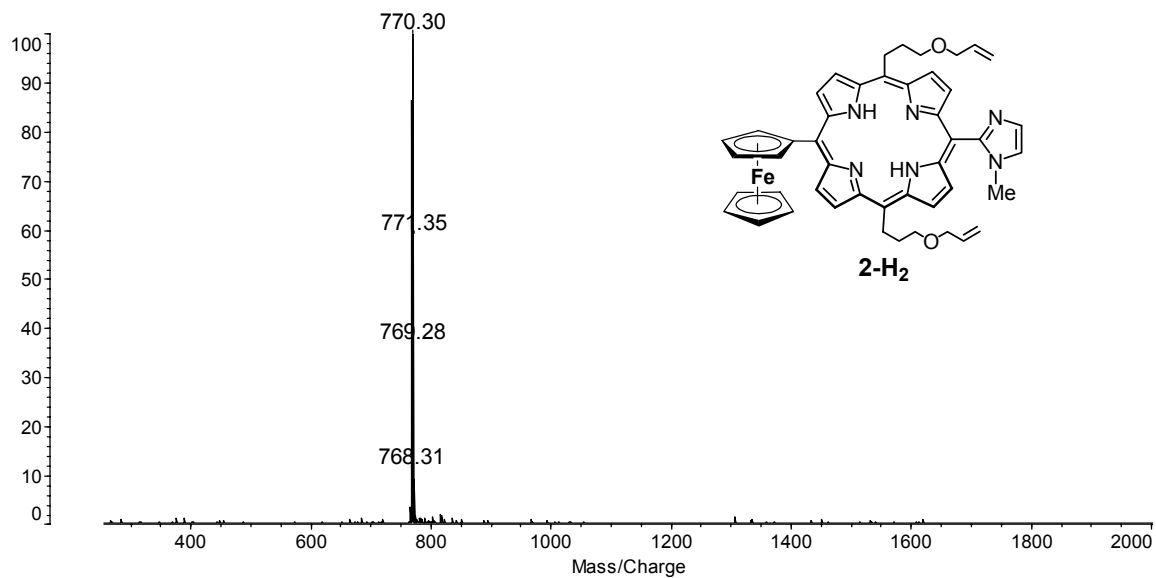

<sup>1</sup>H NMR  
Compound 2-ZnD

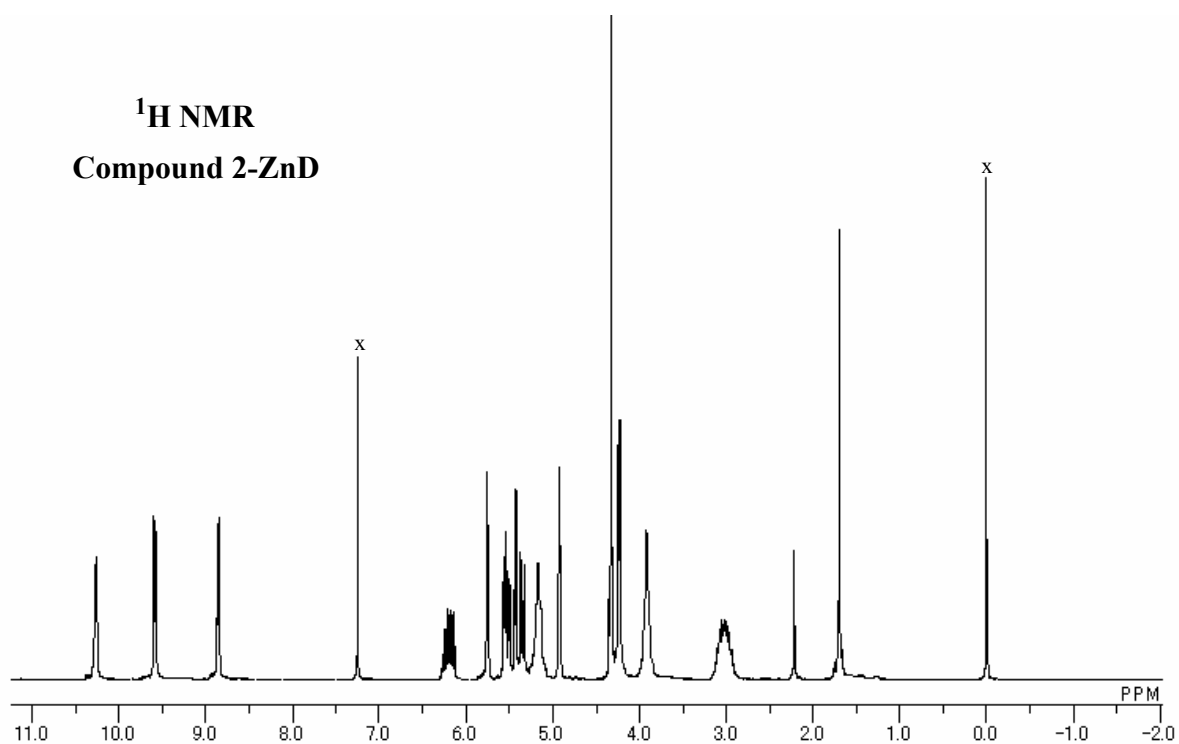

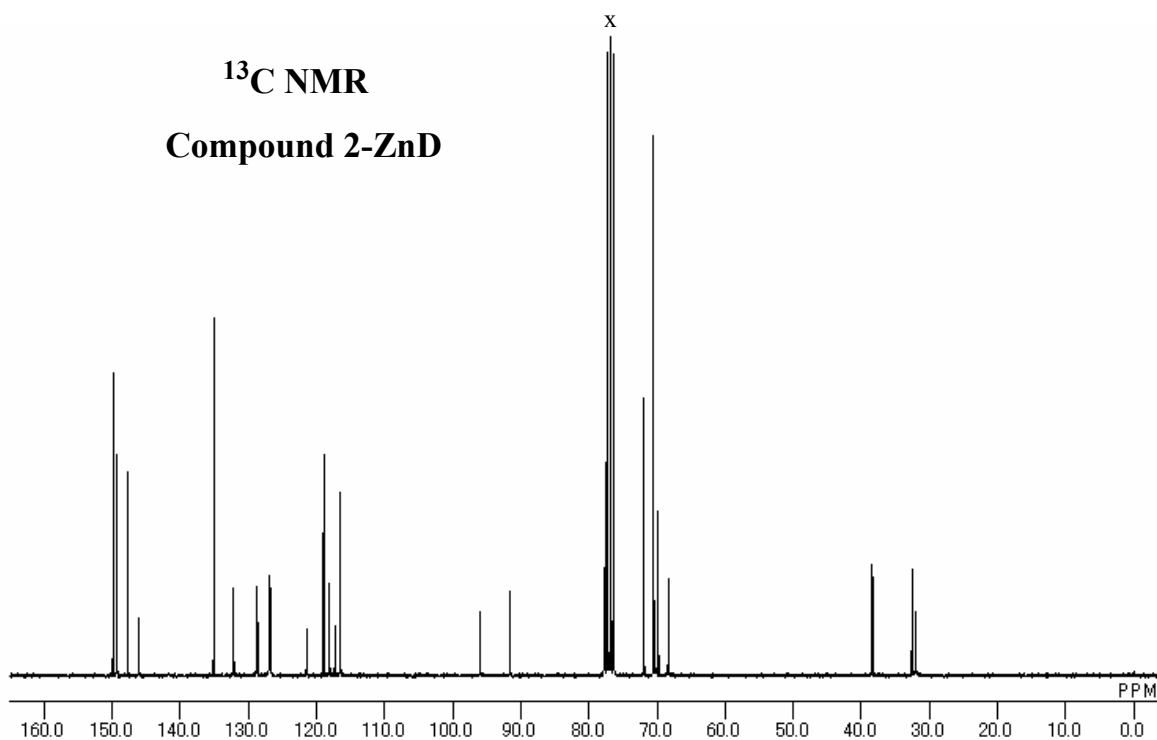

After Maintenance 2004/11/10

Data: DDK-222A Fc-Por-Im -Zn0002.F5 8 Jan 2005 14:08 Cal: 040612\_760\_1050 20 Oct 2004 11:44  
Kratos PC Axima LNR V2.4.0: Mode Linear, Power: 64, P.Ext. @ 832 (bin 54)  
%Int. 4.8 mV[sum= 481 mV] Profiles 1-100 Smooth Gauss 1 -Baseline 10

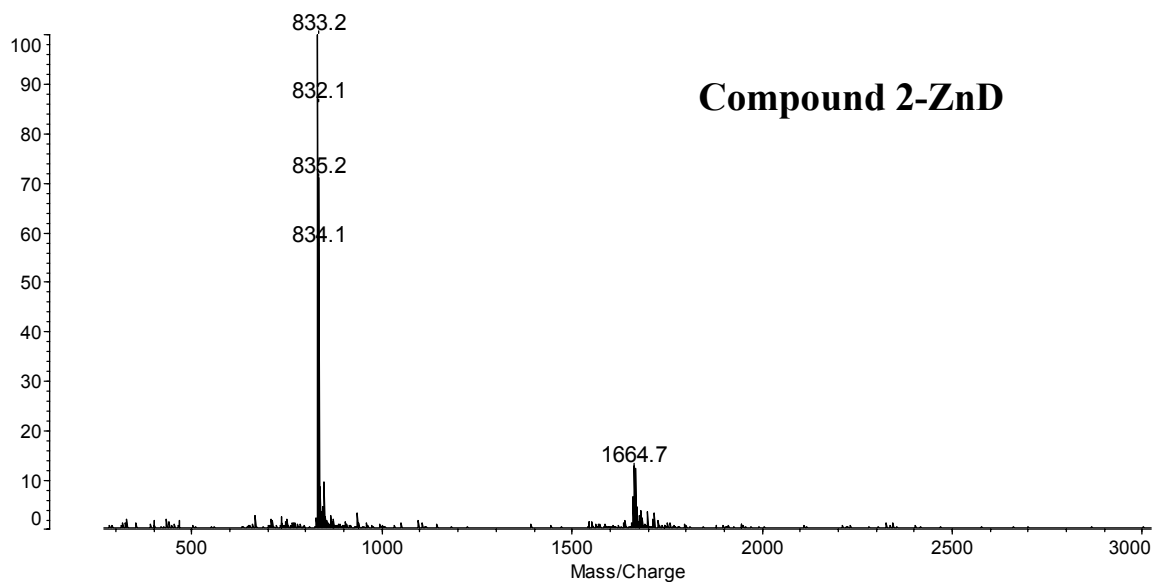

# Supplementary Material (ESI) for New Journal of Chemistry  
# This journal is © The Royal Society of Chemistry and  
# The Centre National de la Recherche Scientifique, 2005

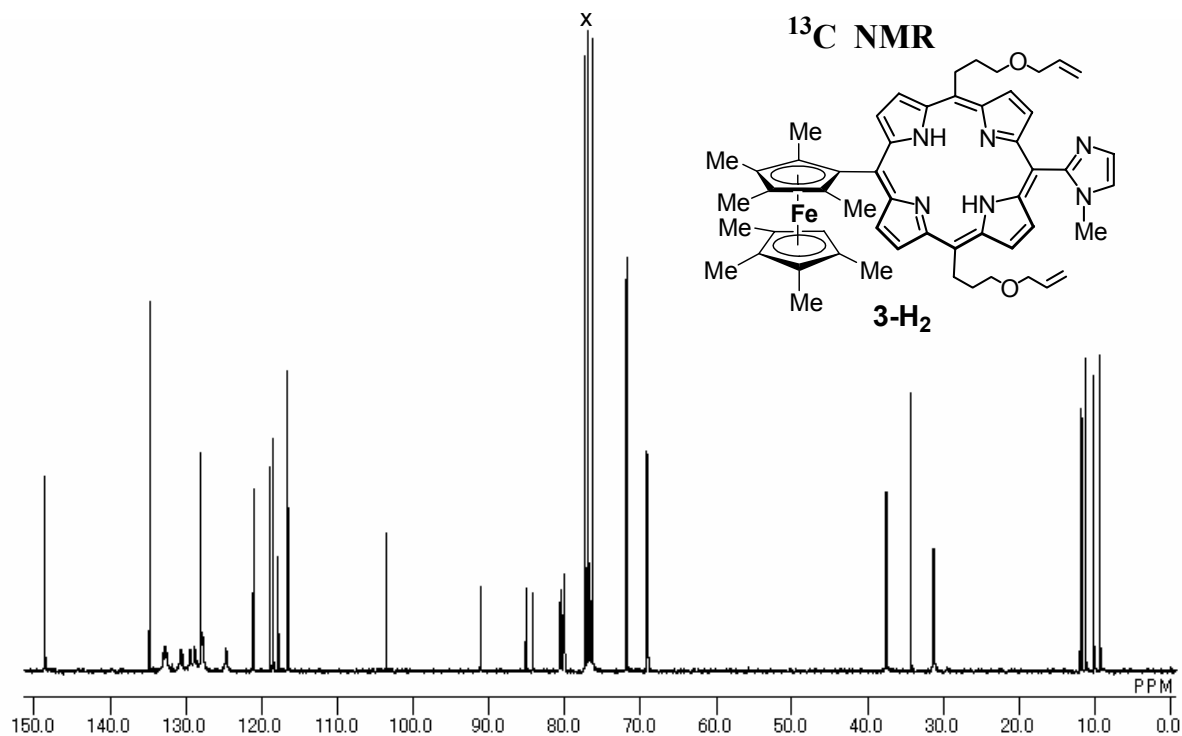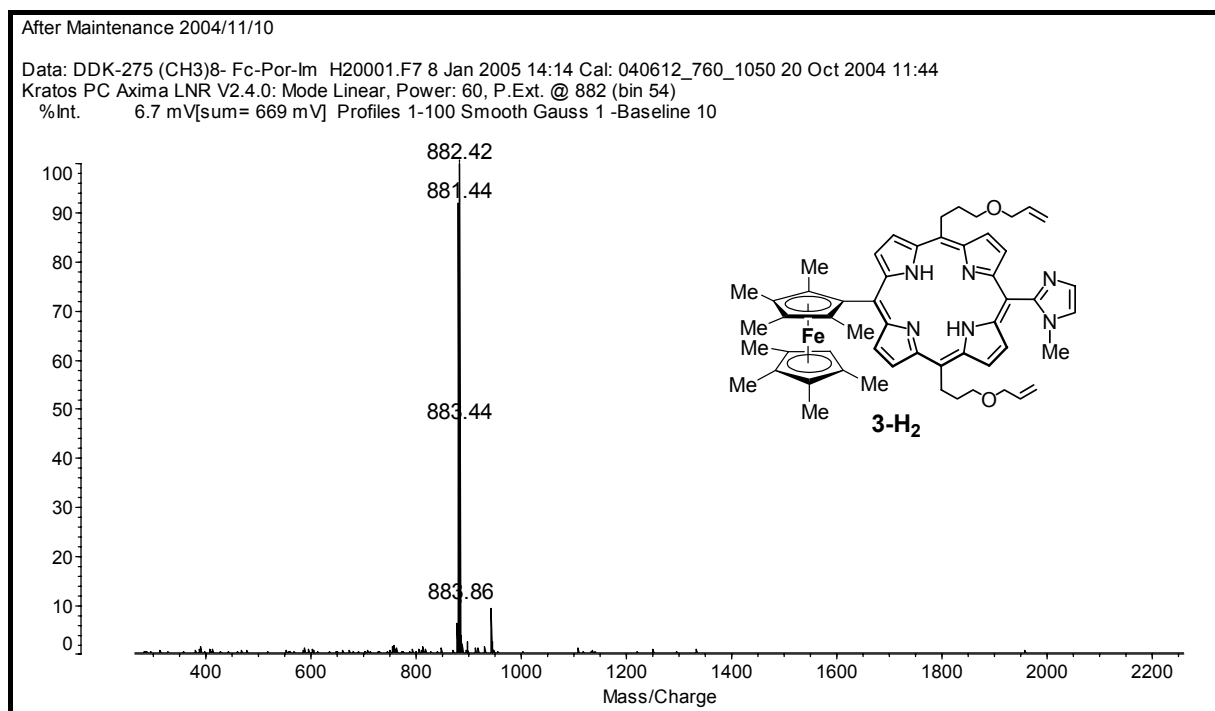

**$^1\text{H}$  NMR**  
**Compound 3-ZnD**

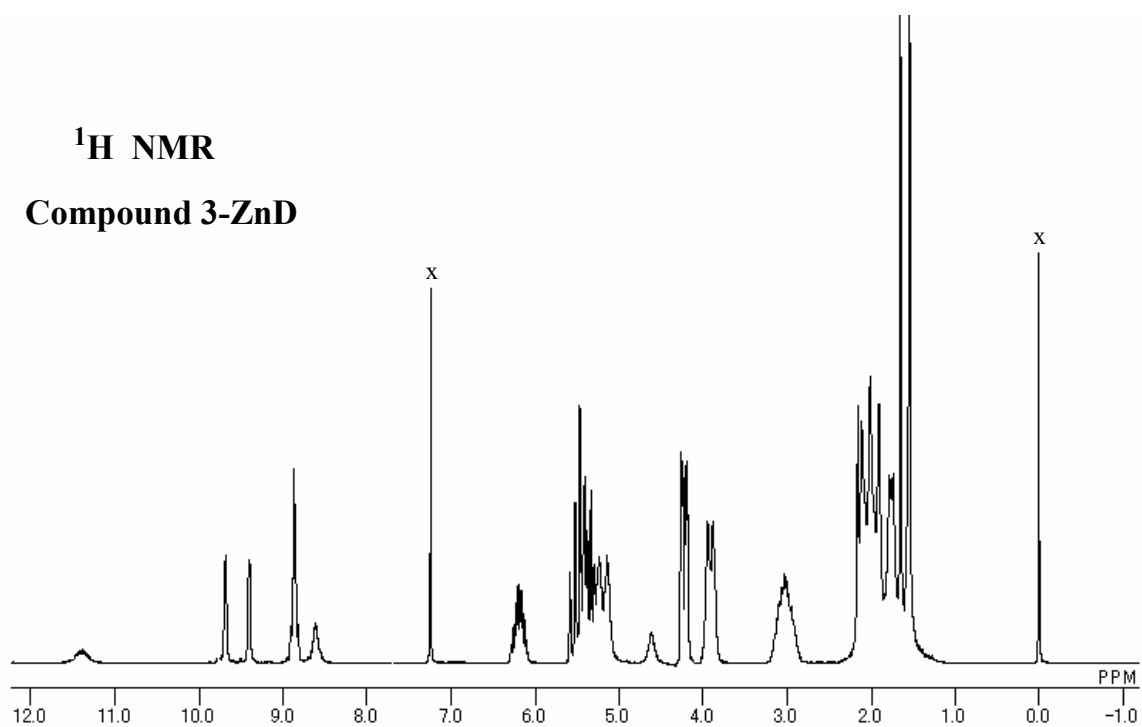

**$^{13}\text{C}$  NMR**  
**Compound 3-ZnD**

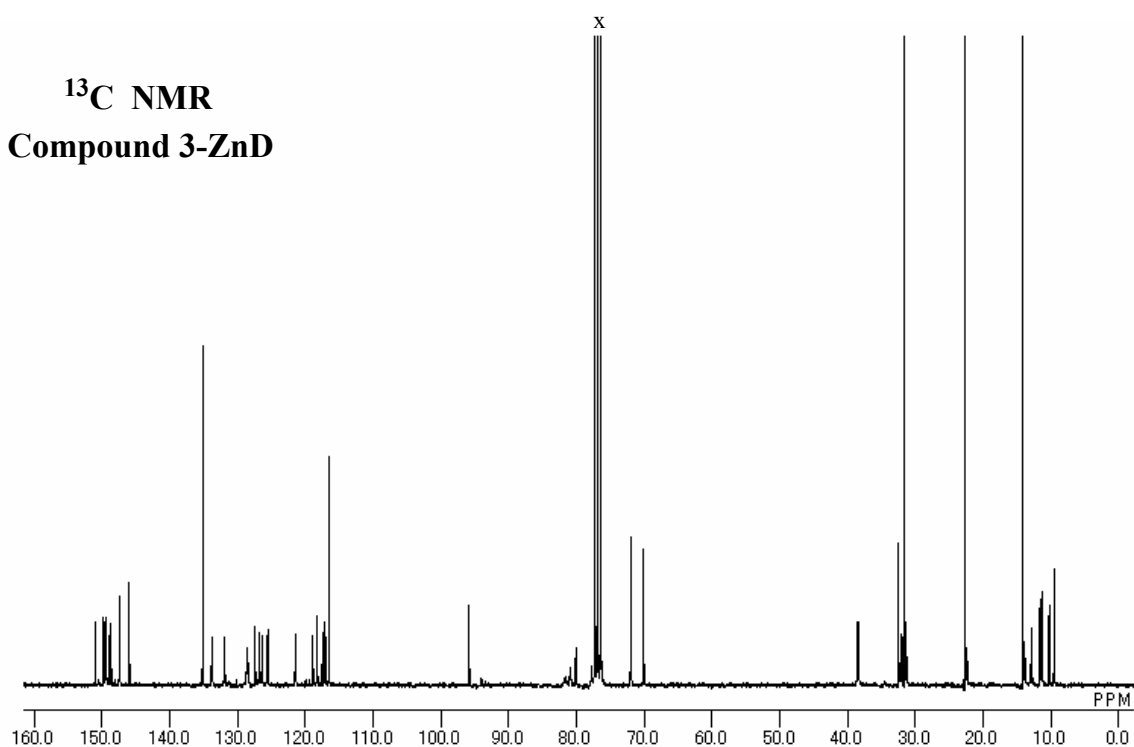



After Maintenance 2004/11/10

Data: DDK-223 (CH3)8- Fc-Por-Im Zn0002.F9 8 Jan 2005 14:26 Cal: InsulinB 10 Nov 2004 18:30  
Kratos PC Axima LNR V2.4.0: Mode Linear, Power: 63, P.Ext. @ 944 (bin 54)  
%Int. 4.0 mV[sum= 402 mV] Profiles 1-100 Smooth Gauss 1 -Baseline 10

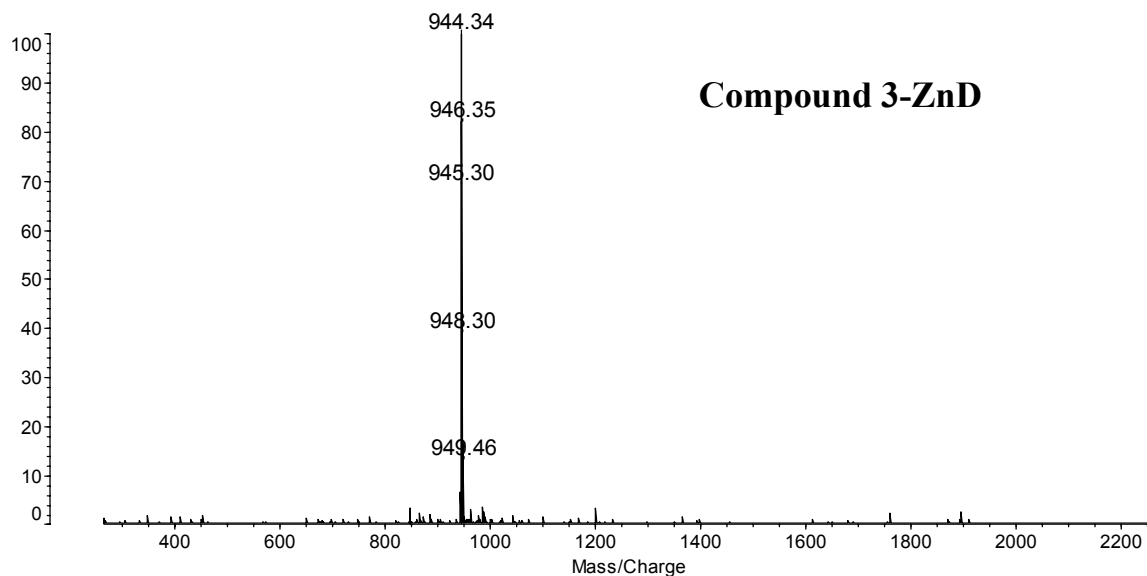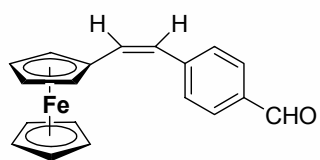

**16** *Z*-isomer

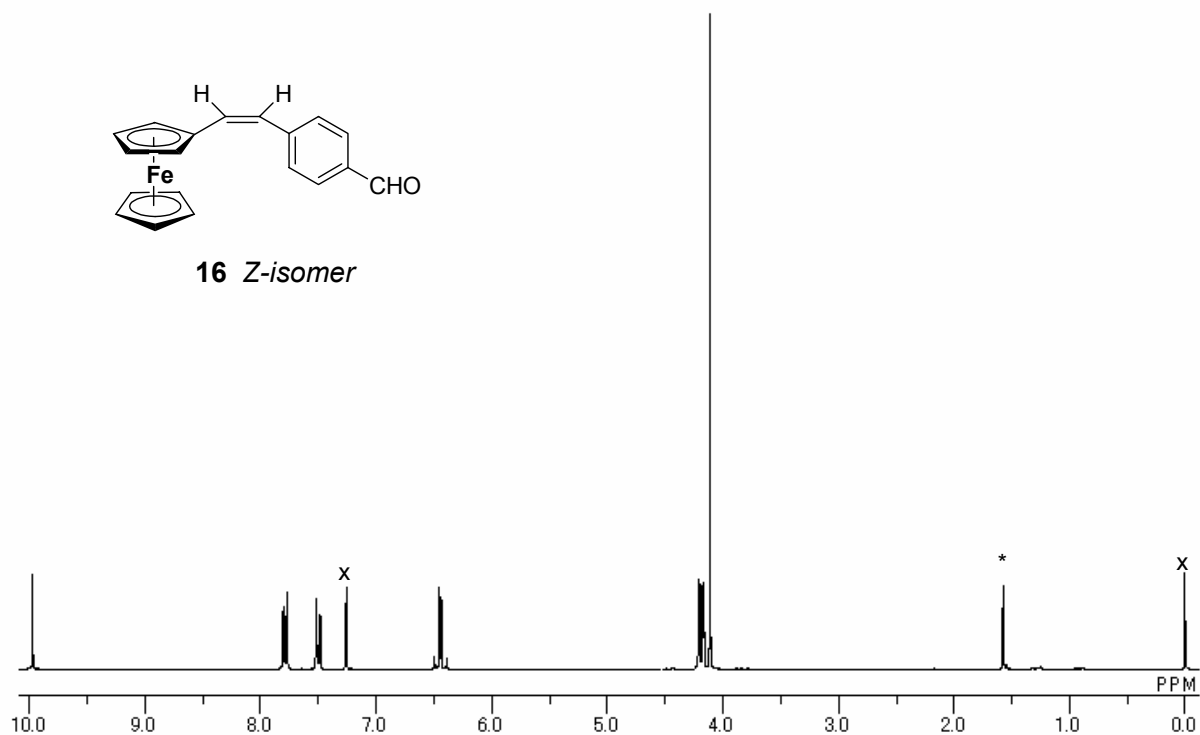

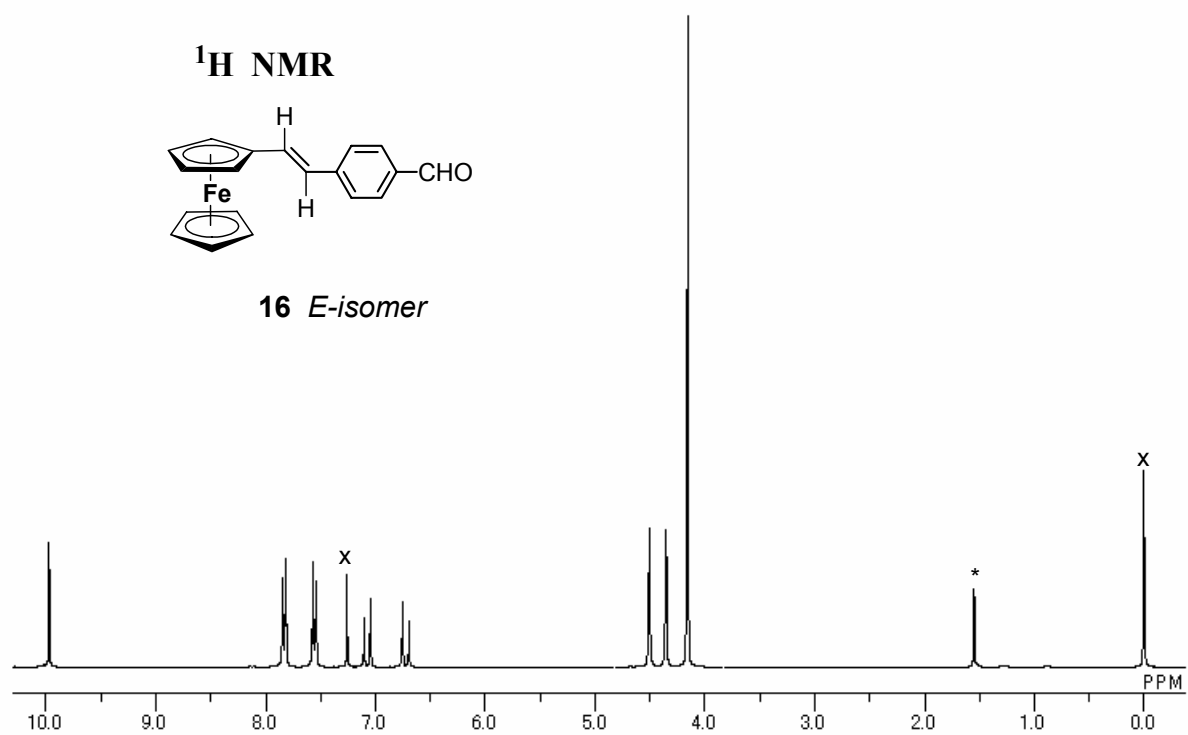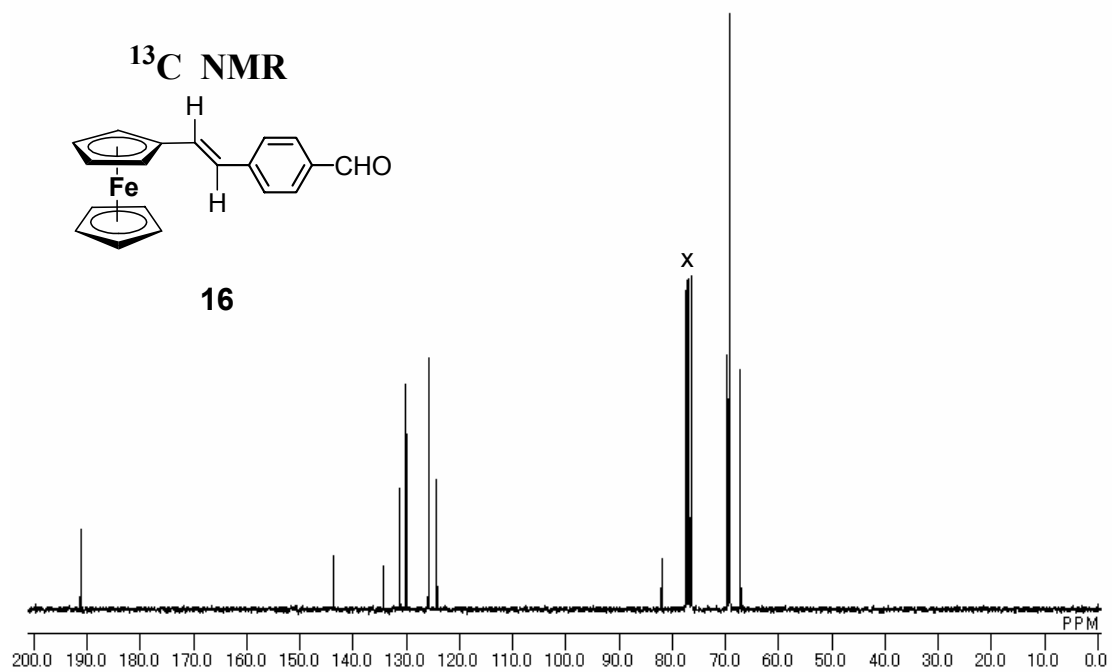

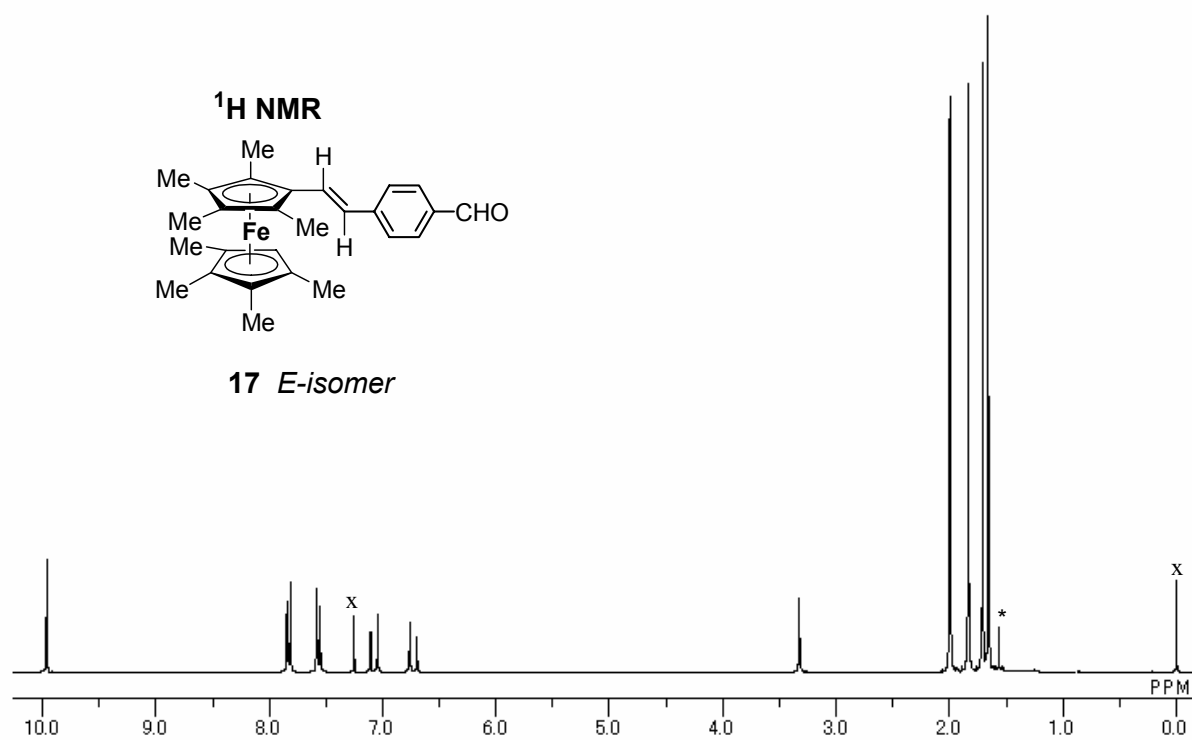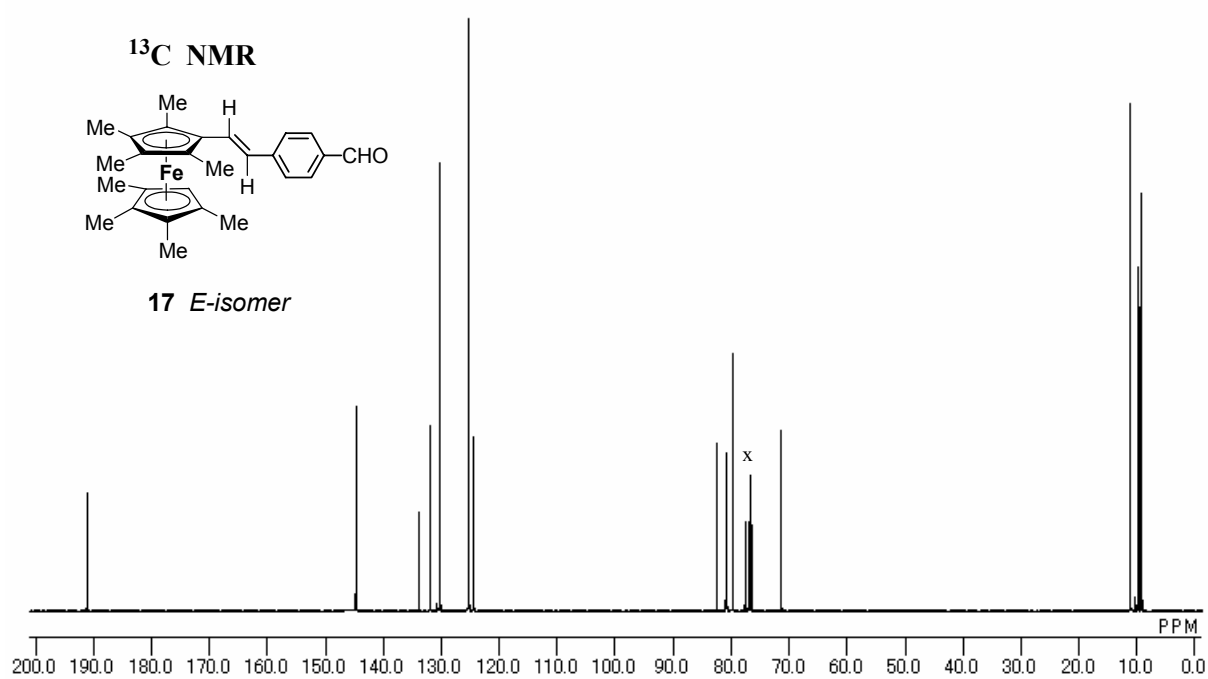

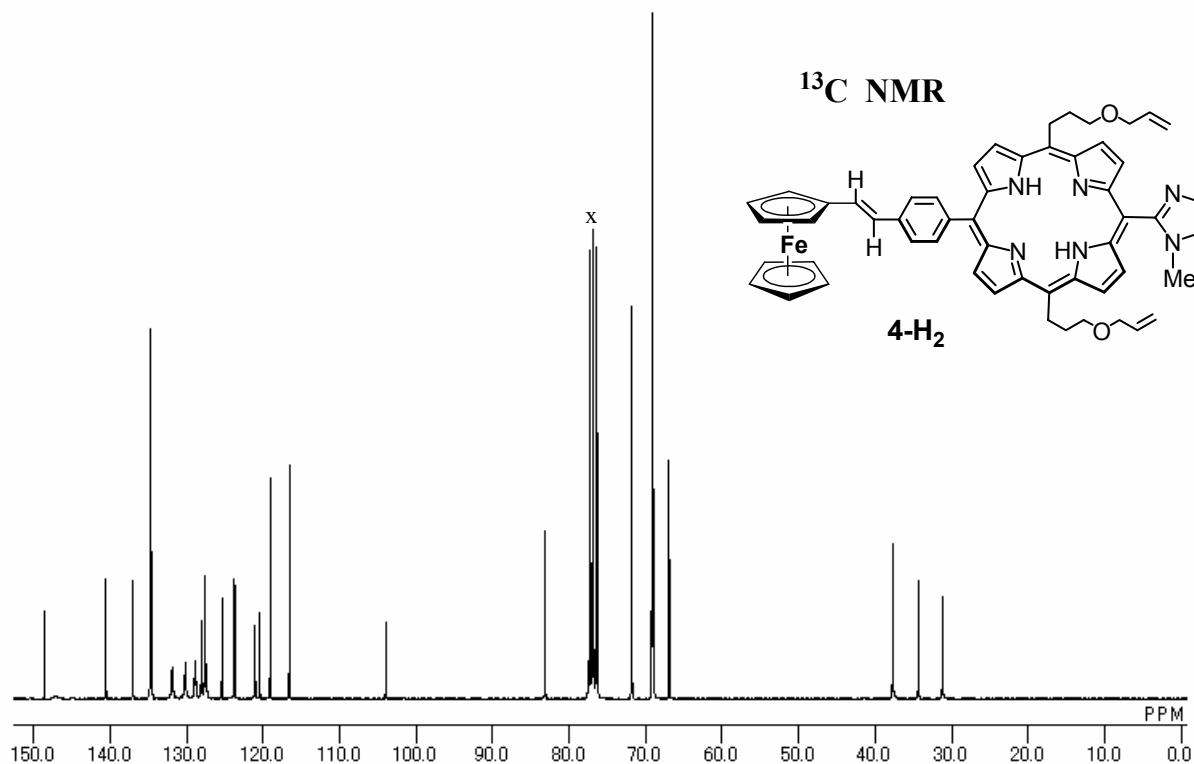

After Maintenance 2004/11/10

Data: DDK-226 Fc-CH=Ch-Ph--Por-Im H20001.F10 8 Jan 2005 14:28 Cal: InsulinB 10 Nov 2004 18:30  
Kratos PC Axima LNR V2.4.0: Mode Linear, Power: 63, P.Ext. @ 872 (bin 54)  
%Int. 73 mV[sum= 7316 mV] Profiles 1-100 Smooth Gauss 1 -Baseline 10

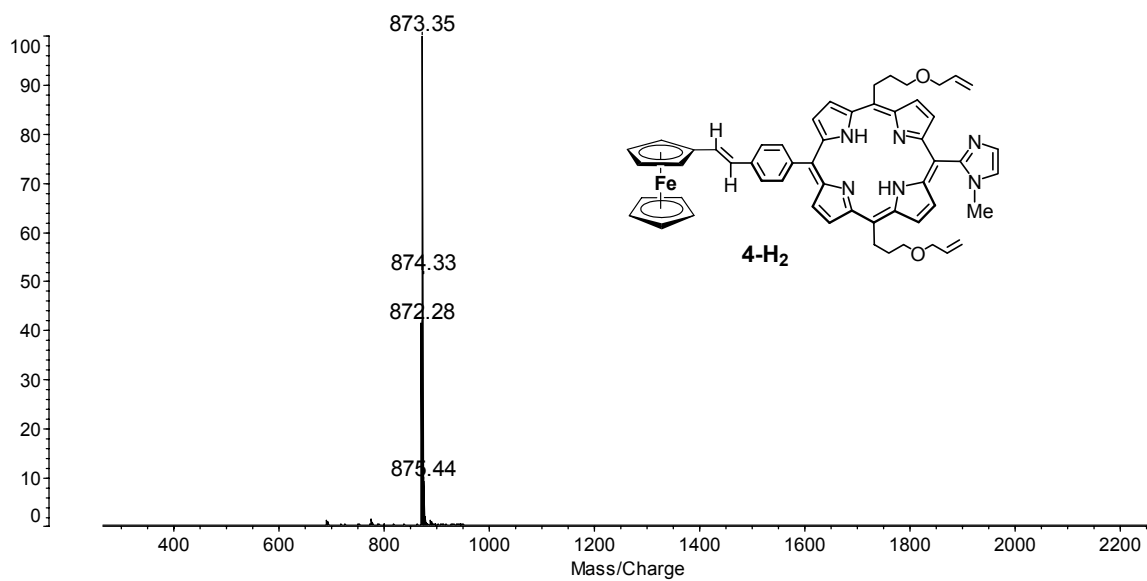

**$^1\text{H}$  NMR**  
**Compound 4-ZnD**

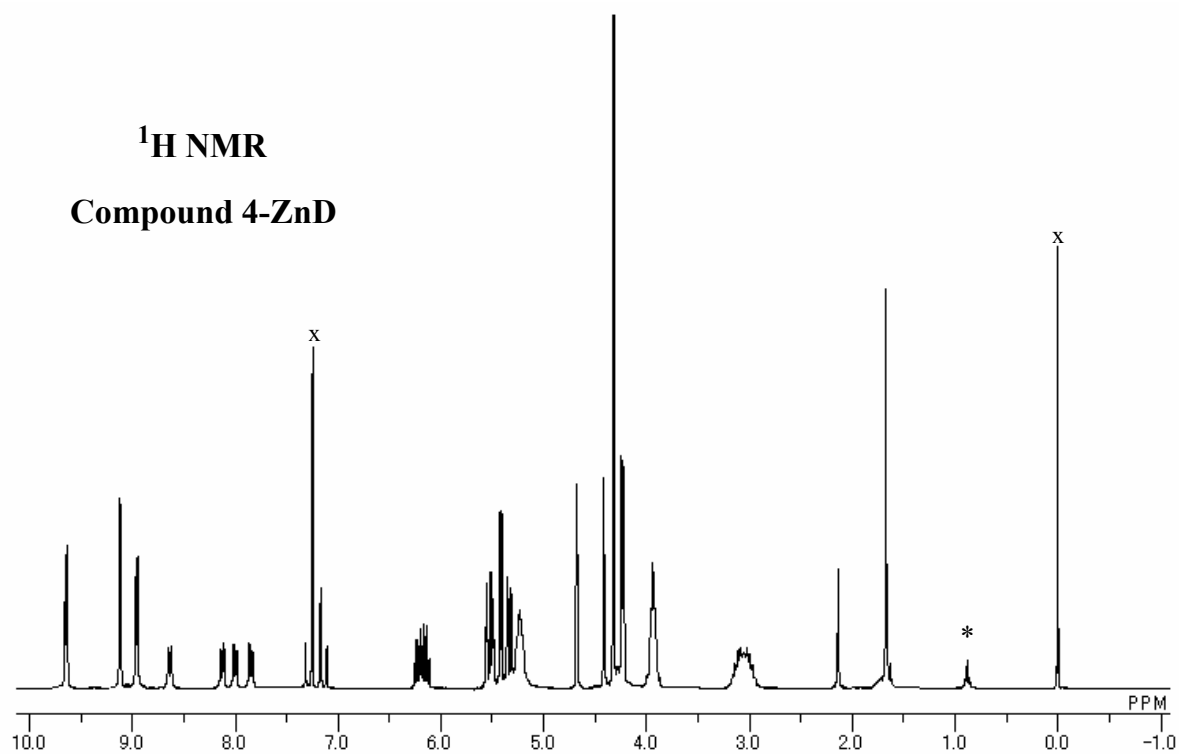

**$^{13}\text{C}$  NMR**  
**Compound 4-ZnD**

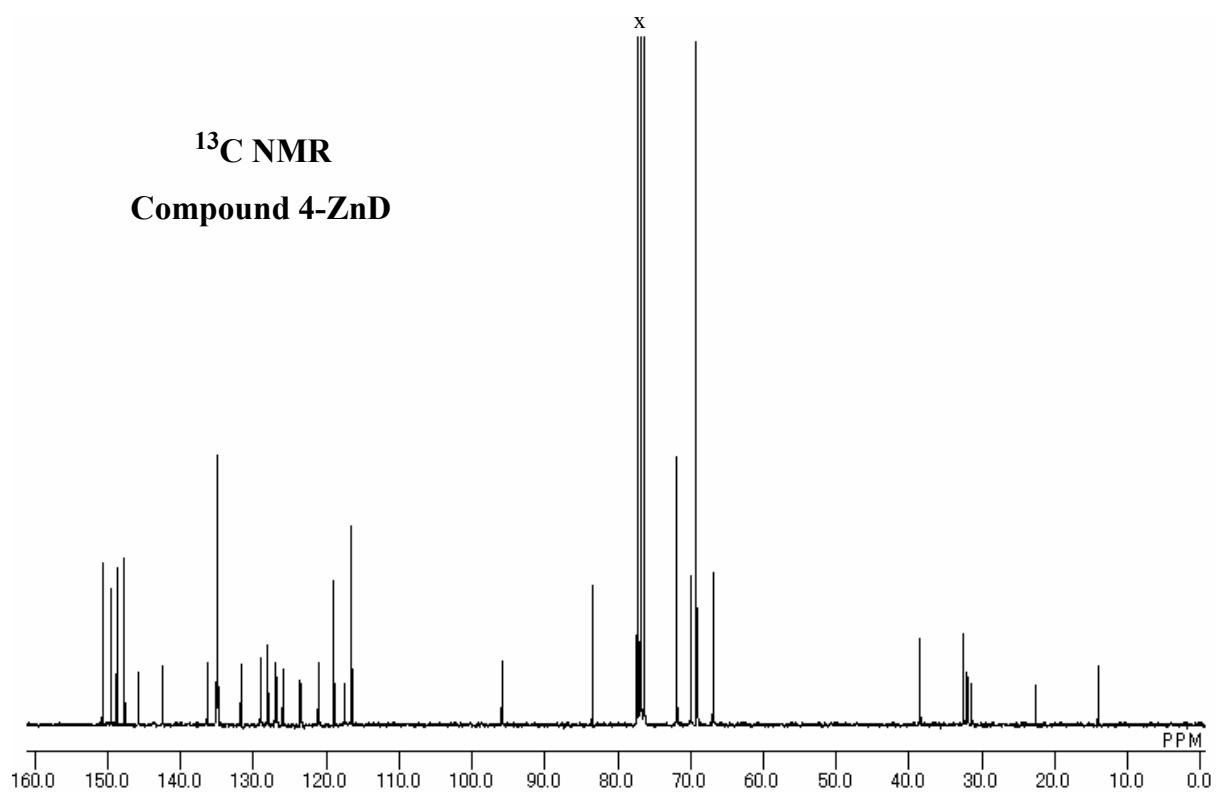

After Maintenance 2004/11/10

Data: DDK-227 Fc-CH=Ch-Ph--Por-Im Zn0001.F11 8 Jan 2005 14:32 Cal: InsulinB 10 Nov 2004 18:30  
Kratos PC Axima LNR V2.4.0: Mode Linear, Power: 63, P.Ext. @ 934 (bin 54)  
%Int. 21 mV[sum= 2102 mV] Profiles 1-100 Smooth Gauss 1 -Baseline 10

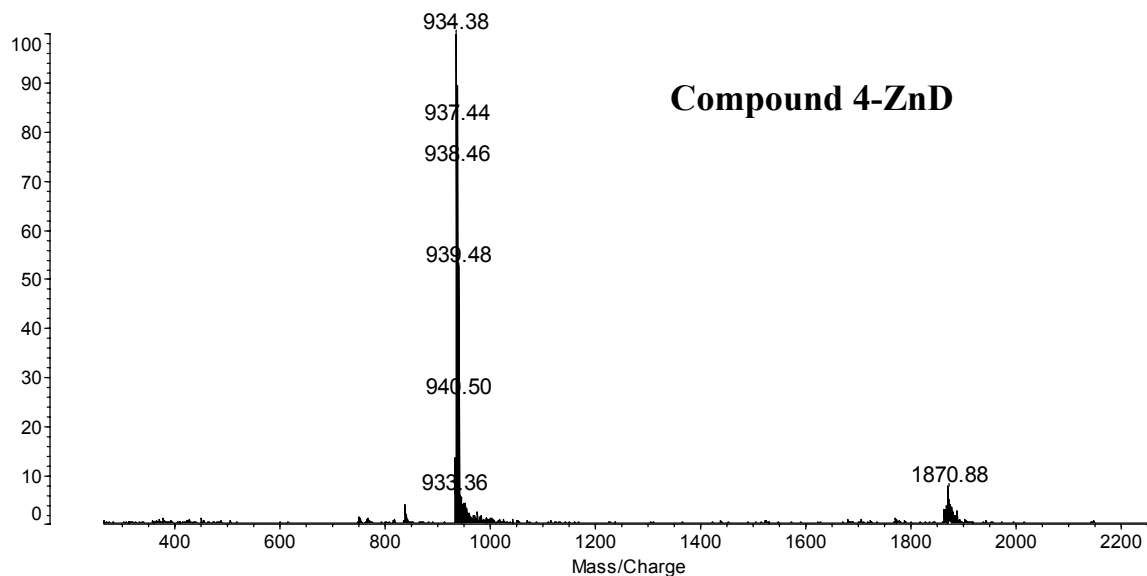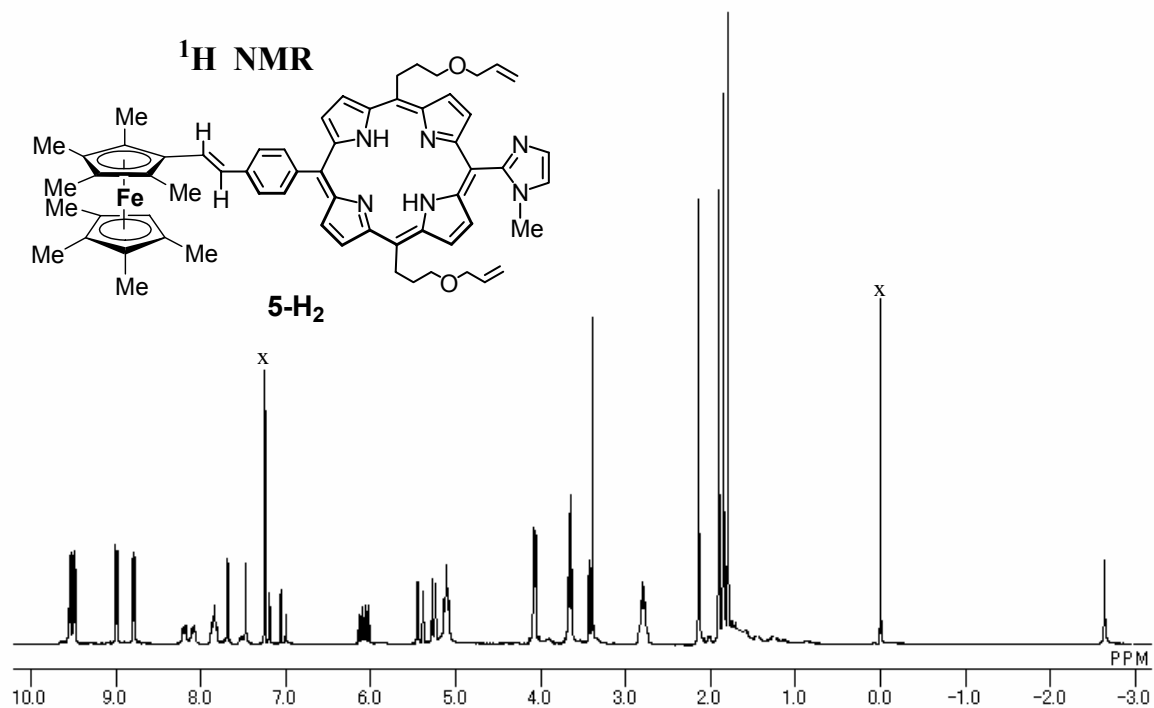

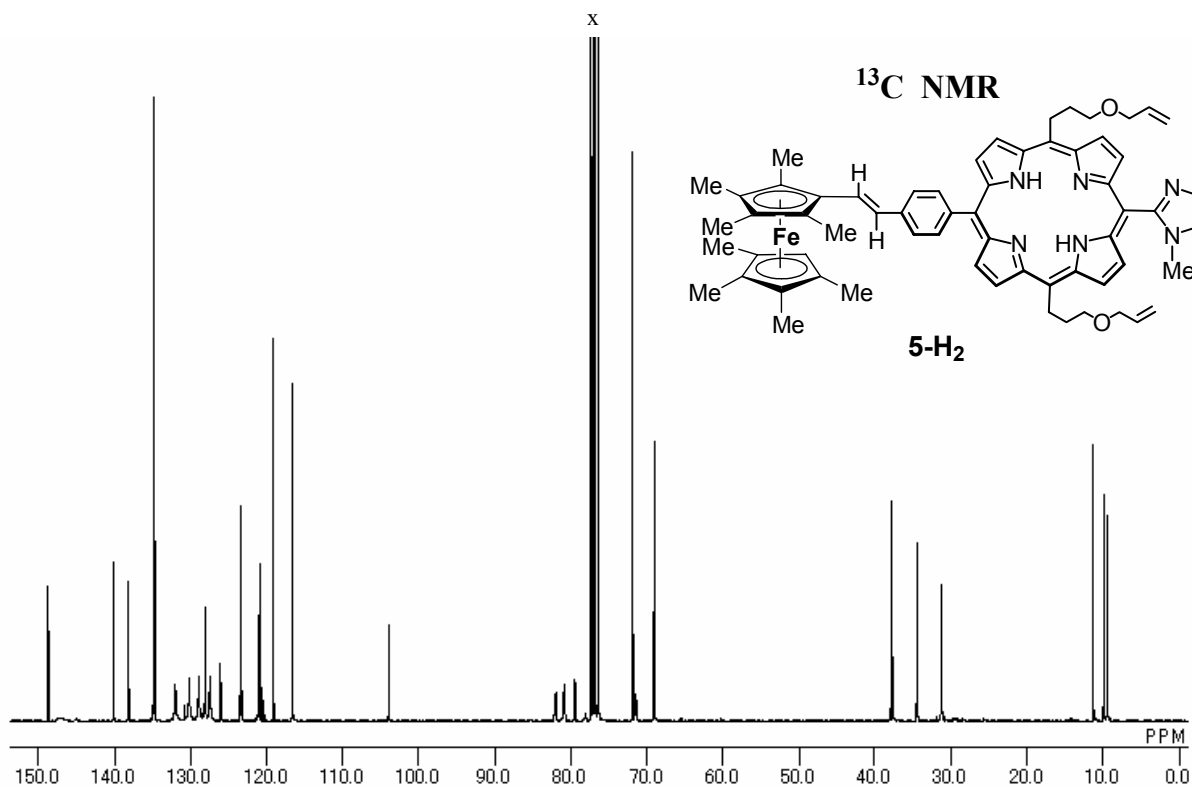

After Maintenance 2004/11/10

Data: DDK-228 (CH<sub>3</sub>)<sub>8</sub>-Fc-CH=CH-Ph--Por-Im H20001.F12 8 Jan 2005 14:35 Cal: InsulinB 10 Nov 2004 18:30  
Kratos PC Axima LNR V2.4.0: Mode Linear, Power: 59, P.Ext. @ 984 (bin 56)  
%Int. 13 mV[sum= 1296 mV] Profiles 1-100 Smooth Gauss 1 -Baseline 10

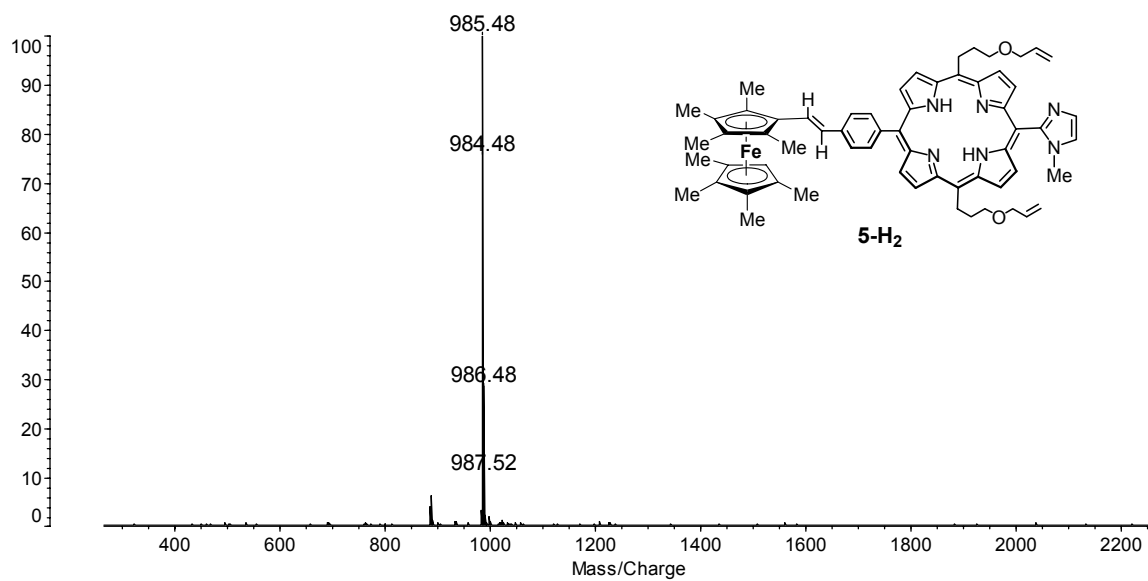

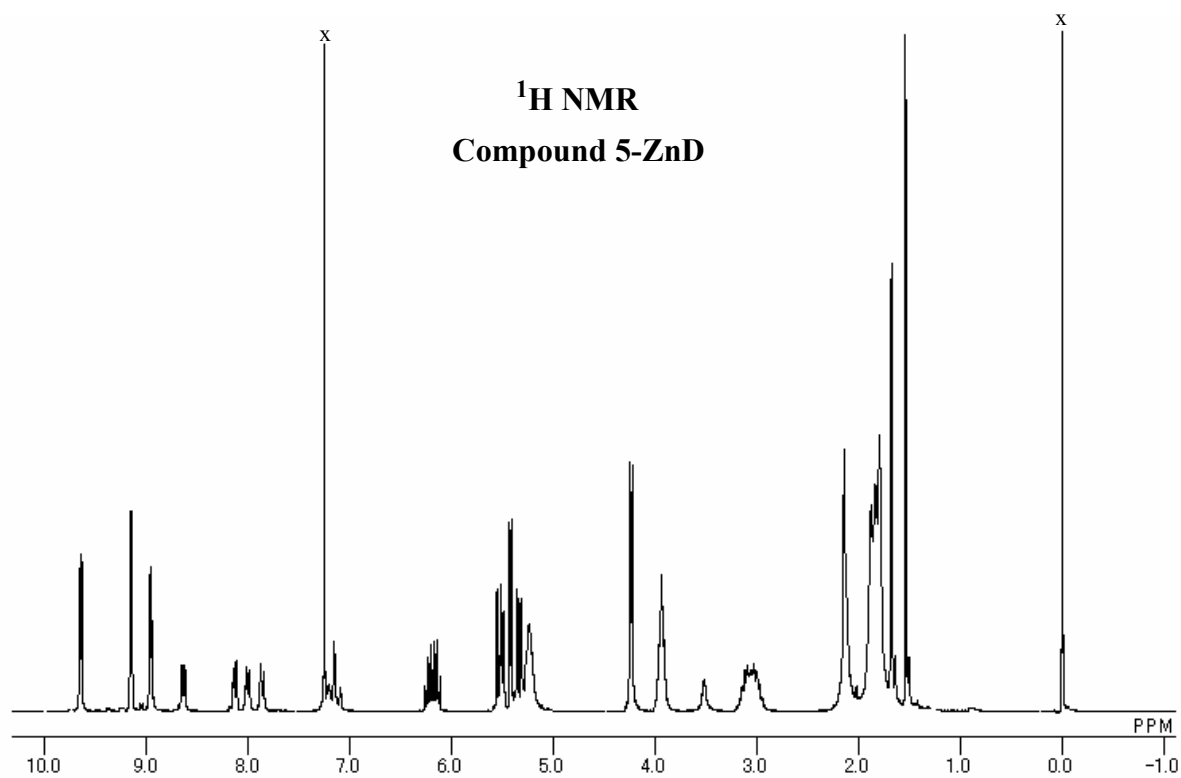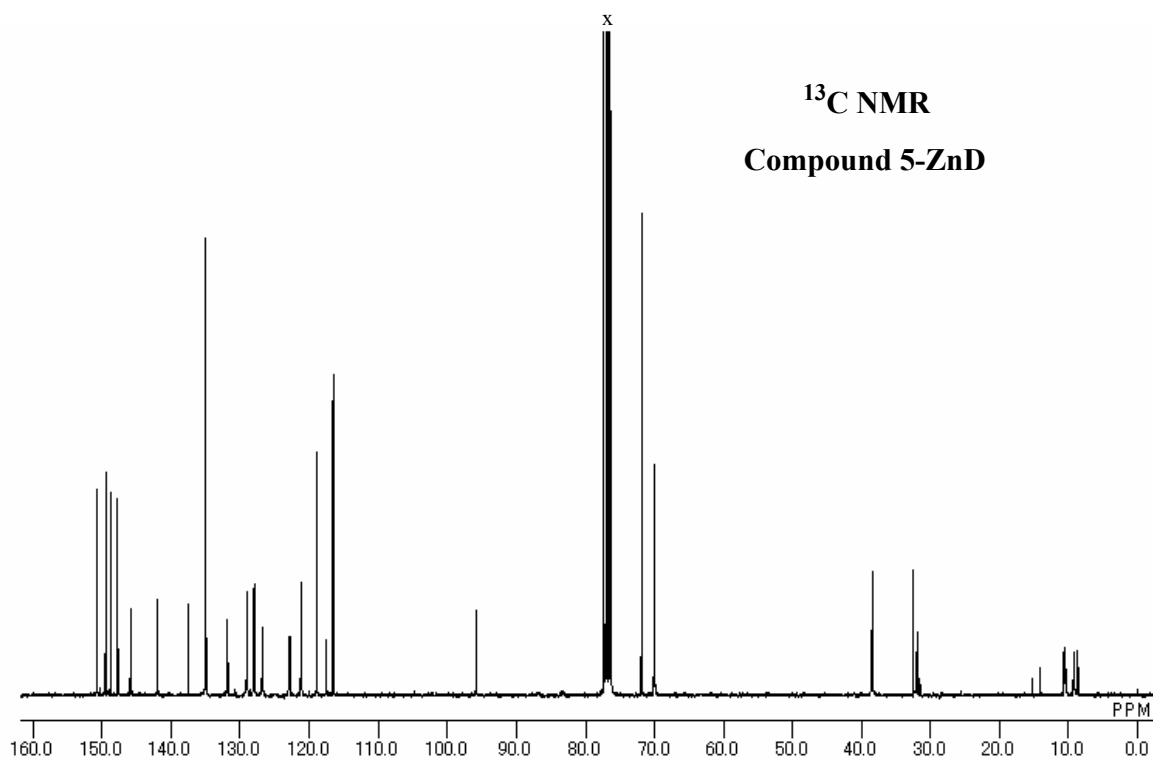



After Maintenance 2004/11/10

Data: DDK-229 (CH<sub>3</sub>)<sub>8</sub>-Fc-CH=CH-Ph--Por-Im Zn0003.E1 8 Jan 2005 14:48 Cal: InsulinB 10 Nov 2004 18:30  
Kratos PC Axima LNR V2.4.0: Mode Linear, Power: 63, P.Ext. @ 1046 (bin 57)  
%Int. 19 mV[sum= 1916 mV] Profiles 1-100 Smooth Gauss 1 -Baseline 10

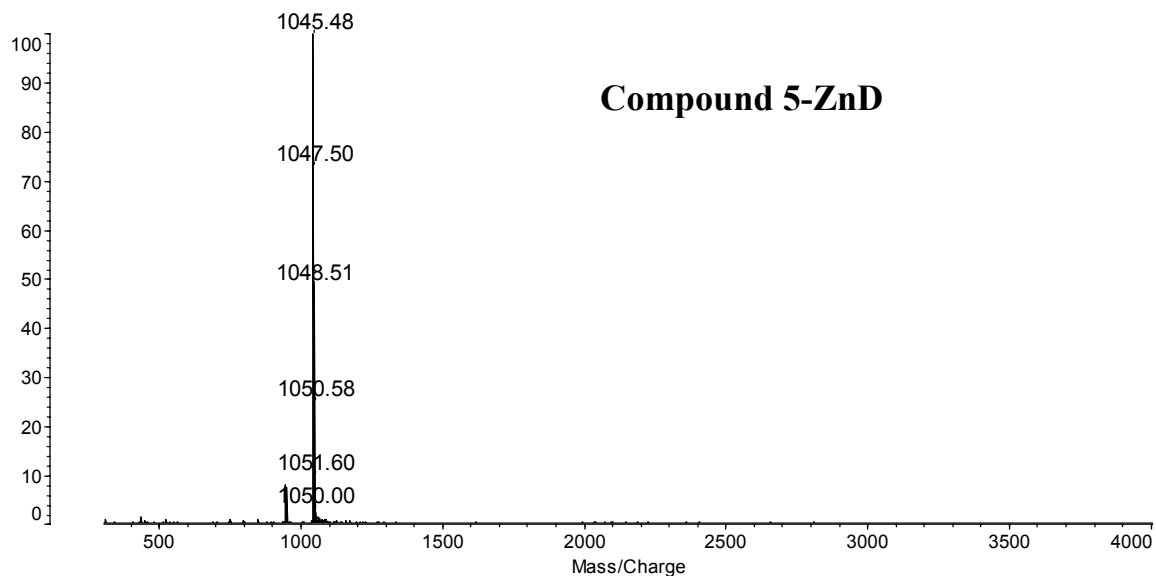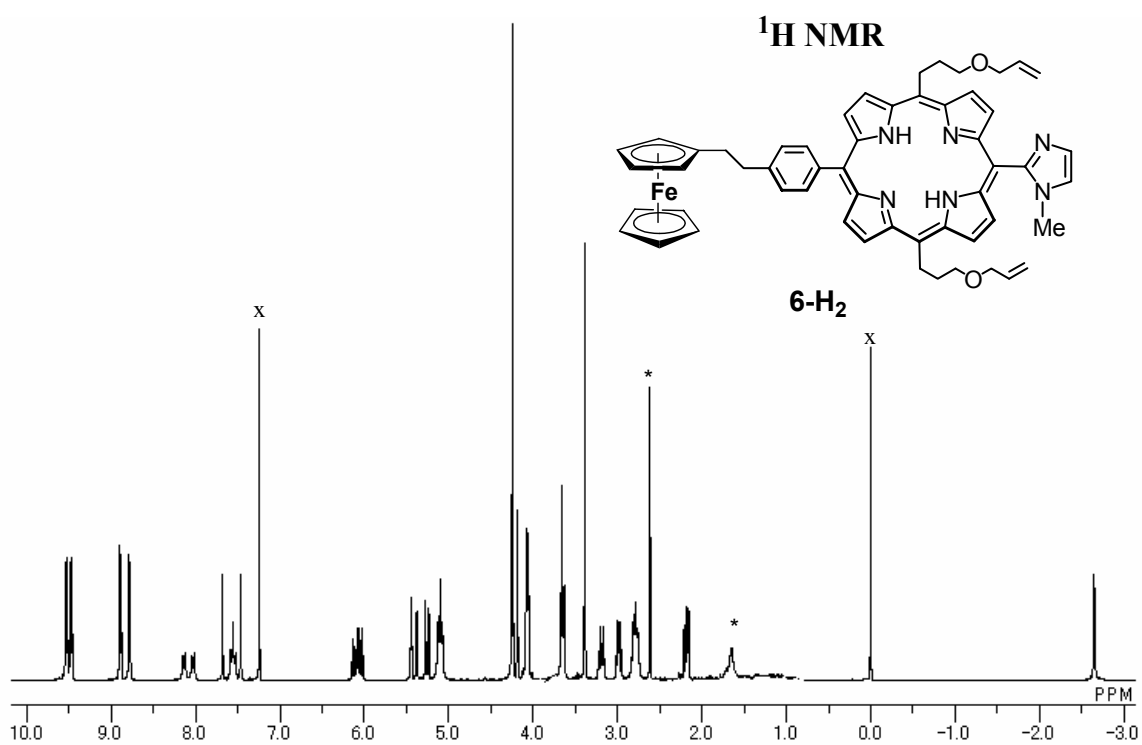

After Maintenance 2004/11/10

Data: DDK-325 Fc-CH<sub>2</sub>CH<sub>2</sub>-Ph--Por-Im H20001.E2 8 Jan 2005 14:51 Cal: InsulinB 10 Nov 2004 18:30  
Kratos PC Axima LNR V2.4.0: Mode Linear, Power: 63, P.Ext. @ 874 (bin 54)  
%Int. 1.8 mV[sum= 176 mV] Profiles 1-100 Smooth Gauss 1 -Baseline 10

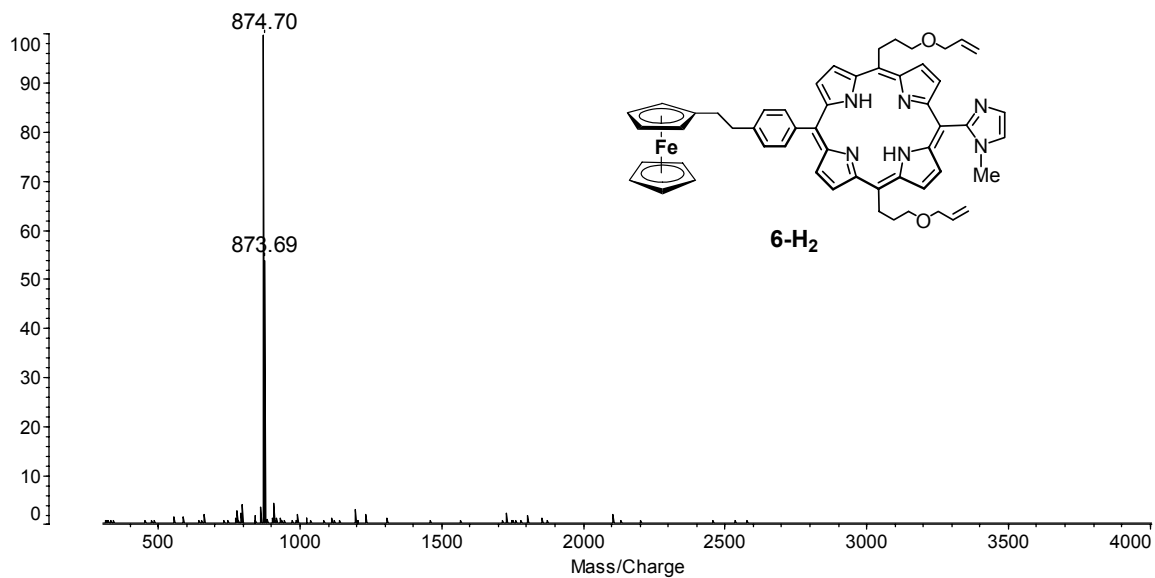

**<sup>1</sup>H NMR**  
**Compound 6-ZnD**

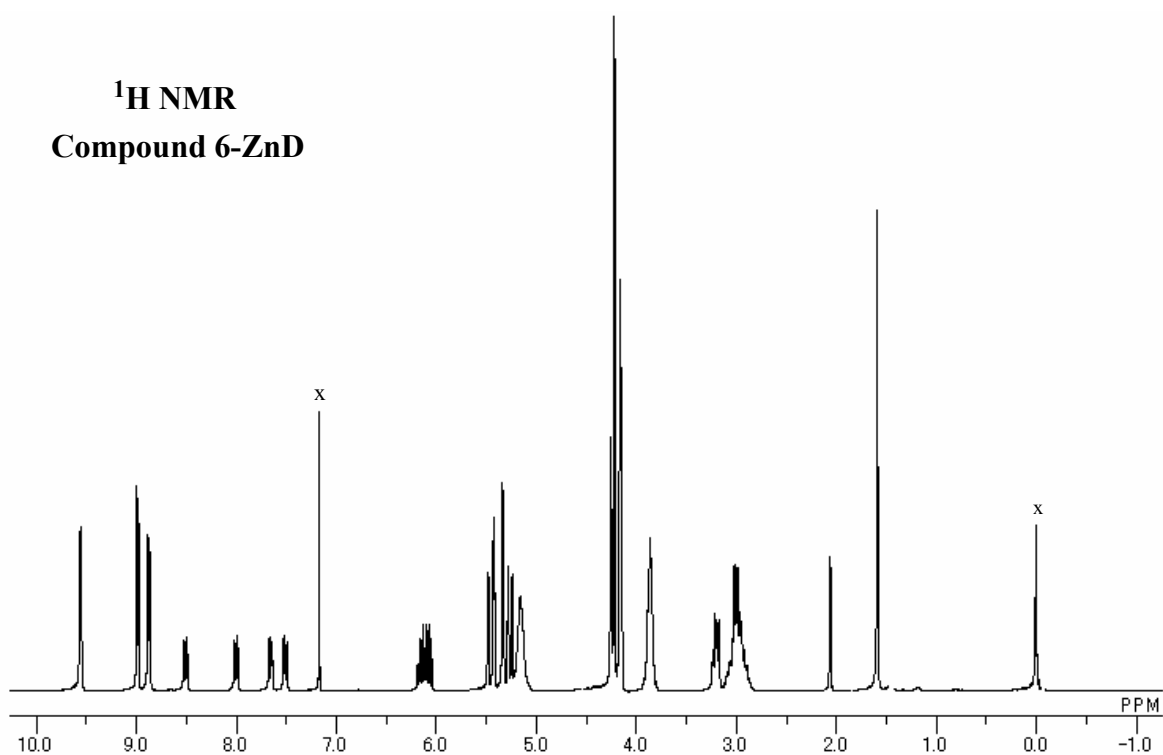

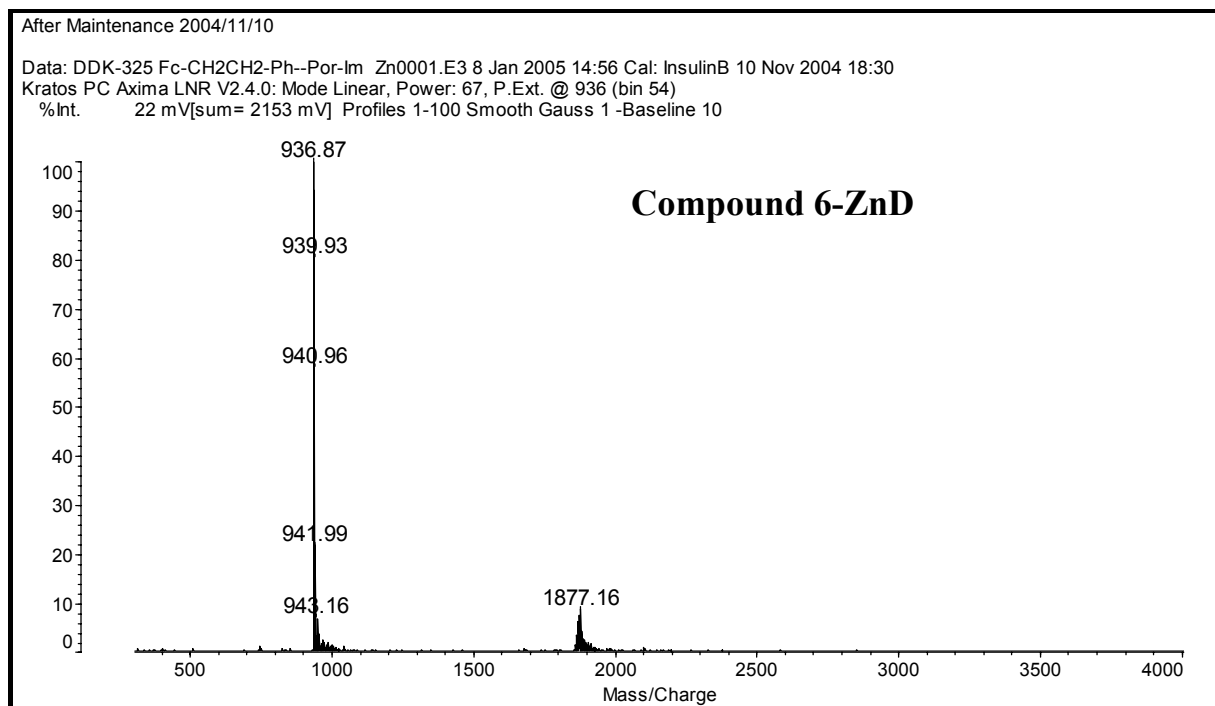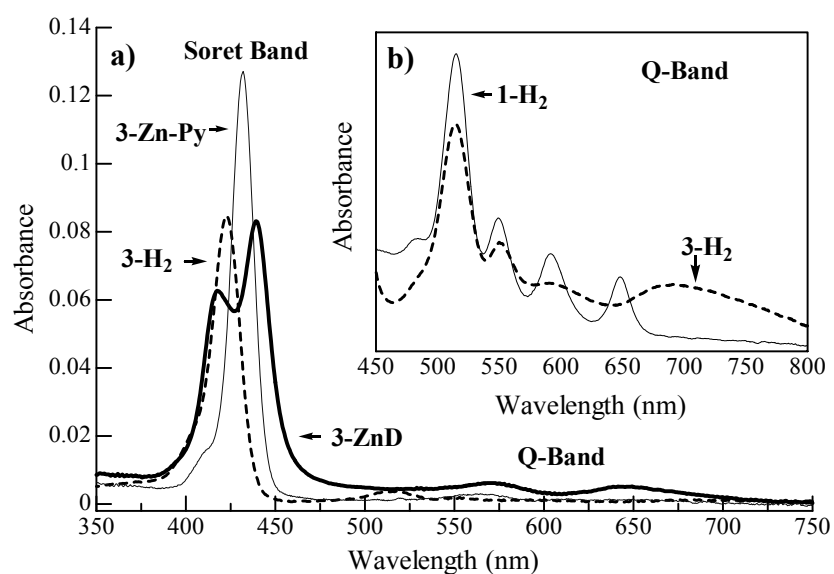

**Figure S1.** UV-visible absorption spectra of a) free base porphyrin **3-H<sub>2</sub>** (bold broken line), Zn-dimer **3-ZnD** (bold solid line) and compound **3-ZnD** in pyridine, **3-Zn-Py** (thin line) b) inset Q-band region of the reference free base sample **1-H<sub>2</sub>** (thin line) and **3-H<sub>2</sub>** (bold broken line) in CH<sub>2</sub>Cl<sub>2</sub> at rt.

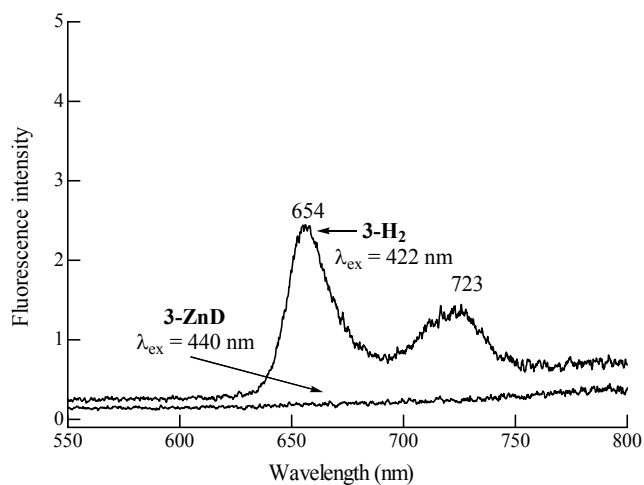

**Figure S2.** Steady state fluorescence spectra of compound **3-H<sub>2</sub>** and **3-ZnD** in CH<sub>2</sub>Cl<sub>2</sub> at 25 °C, with excitation of the Soret band in each case.

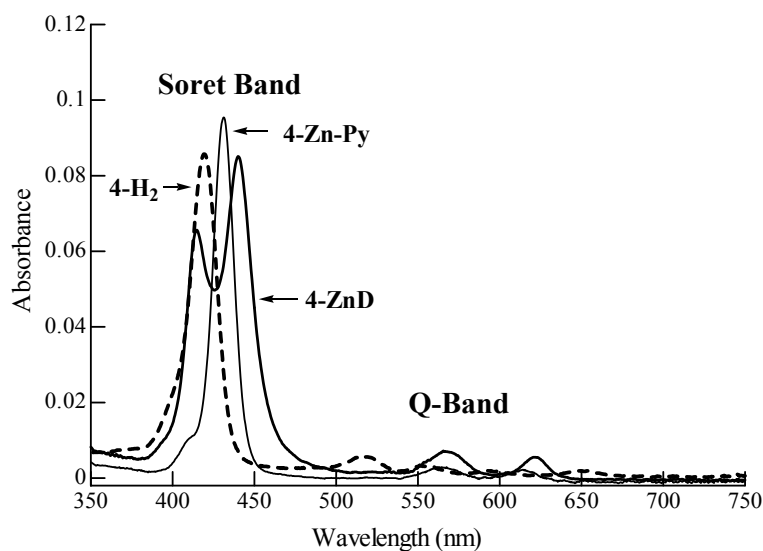

**Figure S3.** UV-visible absorption spectra of free base porphyrin **4-H<sub>2</sub>** (bold broken line), Zn-dimer **4-ZnD** (bold solid line) and compound **4-ZnD** in pyridine, **4-Zn-Py** (thin line) in CH<sub>2</sub>Cl<sub>2</sub> at rt.

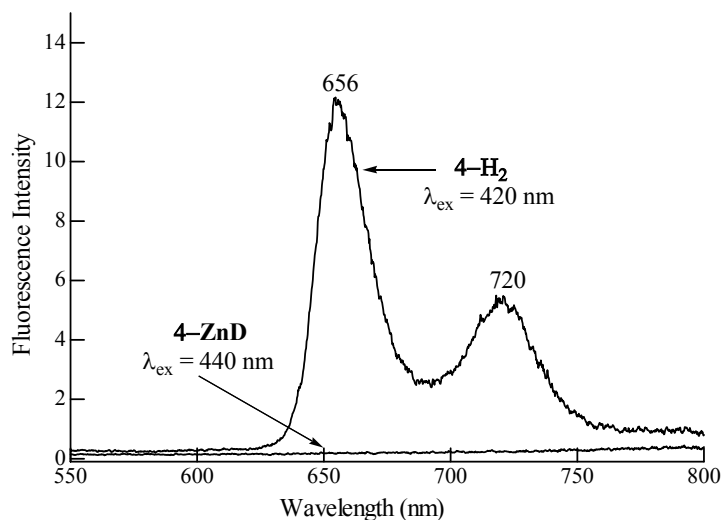

**Figure S4.** Steady state fluorescence spectra of compound **4-H<sub>2</sub>** and **4-ZnD** in CH<sub>2</sub>Cl<sub>2</sub> at 25 °C, with excitation of the Soret band in each case.

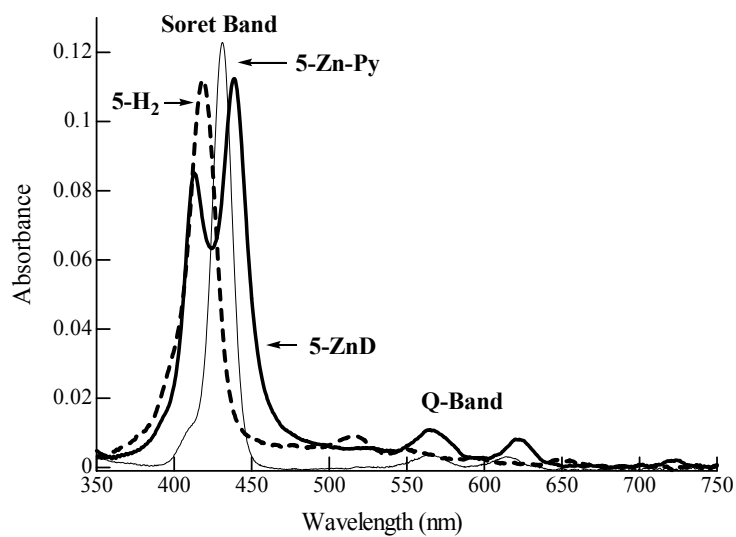

**Figure S5.** UV-visible absorption spectra of free base porphyrin **5-H<sub>2</sub>** (bold broken line), Zn-dimer **5-ZnD** (bold solid line) and compound **5-ZnD** in pyridine, **5-Zn-Py** (thin line) in CH<sub>2</sub>Cl<sub>2</sub> at rt.

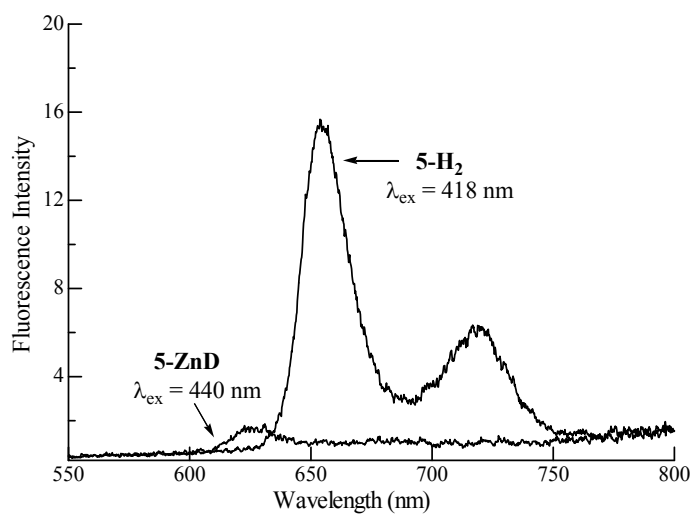

**Figure S6.** Steady state fluorescence spectra of compound **5-H<sub>2</sub>** and **5-ZnD** in CH<sub>2</sub>Cl<sub>2</sub> at 25 °C, with excitation of the Soret band in each case.
